# Supplementary material for: Impact of Lactobacillus casei BL23 on the Host Transcriptome, Growth and Disease Resistance in Larval Zebrafish
Source: Front Physiol. 2018 Sep 4;9:1245. doi: 10.3389/fphys.2018.01245 (PMC6131626; doi:10.3389/fphys.2018.01245)
Supplement: TABLE S1 — Difference of genes expression between control group and treatment group zebrafish at 14 dpf. [file Table_1.XLSX]

## Sheet: Sheet1
Gene_id	readcount_ZF_BL23	readcount_ZF_CK	log2.Fold_change.	pvalue	qvalue	Gene Name	Description
ENSDARG00000000563	1401.95	3796.97	-1.4374	8.8464e-232	6.9144e-228	ttnb	Protein kinase domain||Protein kinase-like domain||Immunoglobulin-like domain||Fibronectin type III||-||Serine/threonine/dual specificity protein kinase, catalytic domain||Immunoglobulin subtype||Tyrosine-protein kinase, active site||Immunoglobulin I-set||Immunoglobulin subtype 2
ENSDARG00000001953	35.7099	143.696	-2.0086	5.9111e-16	2.1001e-13	pfkfb3	Fructose-2,6-bisphosphatase||Histidine phosphatase superfamily||Phosphoglycerate/bisphosphoglycerate mutase, active site||Histidine phosphatase superfamily, clade-1||6-phosphofructo-2-kinase||P-loop containing nucleoside triphosphate hydrolase
ENSDARG00000007241	61.3869	22.4852	1.449	6.6752e-06	0.00074533	mycb	Transcription regulator Myc, N-terminal||Transcription regulator Myc||Leucine zipper, Myc||Myc-type, basic helix-loop-helix (bHLH) domain
ENSDARG00000007344	54.0749	111.903	-1.0492	1.8383e-05	0.0018343	tcap	Telethonin
ENSDARG00000007628	122.349	48.7354	1.328	2.3446e-09	5.0436e-07	-//-
ENSDARG00000008433	88.7645	41.3101	1.1035	9.3295e-06	0.00098985	unc45b	Tetratricopeptide repeat-containing domain||Armadillo||-||Armadillo-type fold||Tetratricopeptide repeat||Tetratricopeptide TPR1||UNC-45/Ring assembly protein 3
ENSDARG00000010276	35.4548	4.70621	2.9133	1.6453e-07	2.5892e-05	ptgs2b	Epidermal growth factor-like domain||Haem peroxidase, animal||Haem peroxidase
ENSDARG00000010420	52.9696	128.323	-1.2765	5.8999e-08	9.7423e-06	ndrg1b	NDRG||Alpha/Beta hydrolase fold
ENSDARG00000010478	349.787	117.342	1.5758	4.0462e-30	2.6354e-27	hsp90aa1.1	Heat shock protein Hsp90, N-terminal||Ribosomal protein S5 domain 2-type fold||Heat shock protein Hsp90 family||Histidine kinase-like ATPase, C-terminal domain||Heat shock protein Hsp90, conserved site
ENSDARG00000011122	34.7746	123.407	-1.8273	2.2481e-12	6.2017e-10	pptc7a	Protein phosphatase 2C (PP2C)-like domain
ENSDARG00000015911	60.3667	22.6944	1.4114	1.1684e-05	0.0012176	-//-
ENSDARG00000016391	12.3284	55.0104	-2.1577	1.5098e-07	2.4083e-05	calcoco1b	Coiled-coil transcriptional coactivator-like
ENSDARG00000018524	144.625	67.2466	1.1048	1.4914e-08	2.7321e-06	midn	Ubiquitin-like||Ubiquitin-related domain
ENSDARG00000019360	155.678	62.3312	1.3205	1.9588e-11	5.1606e-09	sec23b	Sec23/Sec24, trunk domain||Sec23/Sec24, helical domain||Sec23/Sec24 beta-sandwich||Zinc finger, Sec23/Sec24-type||von Willebrand factor, type A||Gelsolin-like domain
ENSDARG00000019808	58.071	212.616	-1.8724	7.0329e-21	3.1713e-18	evpla	Plectin repeat||Spectrin/alpha-actinin
ENSDARG00000020107	75.6709	164.299	-1.1185	4.0799e-08	7.0863e-06	usp2a	-||Ubiquitin specific protease, conserved site||Peptidase C19, ubiquitin carboxyl-terminal hydrolase||Ubiquitin specific protease domain
ENSDARG00000020133	30.6935	3.45122	3.1528	4.4222e-07	6.4405e-05	jdp2b	Basic-leucine zipper domain||AP-1 transcription factor
ENSDARG00000020239	56.2005	143.278	-1.3502	1.9938e-09	4.3692e-07	lpin1	HAD-like domain||LNS2, Lipin/Ned1/Smp2||Lipin, N-terminal
ENSDARG00000020298	228.373	50.6179	2.1737	7.7969e-30	4.8111e-27	btg2	Anti-proliferative protein
ENSDARG00000021987	218.51	445.731	-1.0285	4.4118e-17	1.7241e-14	plecb	Calponin homology domain||Plectin/S10, N-terminal||Plectin repeat||Actinin-type actin-binding domain, conserved site||Spectrin/alpha-actinin
ENSDARG00000022309	133.232	472.295	-1.8257	7.452e-43	6.2406e-40	dspa	Plectin repeat||Spectrin/alpha-actinin
ENSDARG00000022410	99.1374	3.34664	4.8886	4.2079e-25	2.3492e-22	rrp12	Armadillo-type fold||Uncharacterised domain NUC173||-
ENSDARG00000022424	28.908	71.7436	-1.3114	3.4013e-05	0.0031649	slc26a5	Sulphate anion transporter||STAS domain||Sulphate transporter||Sulfate transporter N-terminal domain with GLY motif||Sulphate anion transporter, conserved site
ENSDARG00000022615	12.6685	51.1408	-2.0132	1.3358e-06	0.00017116	si:ch211-241e1.3	Laminin domain II||Concanavalin A-like lectin/glucanase domain||Laminin alpha, domain I||EGF-like, laminin||EGF-like, conserved site||Laminin G domain
ENSDARG00000023062	76.011	23.5311	1.6916	2.4206e-08	4.3998e-06	cyr61	Cystine knot, C-terminal||Insulin-like growth factor-binding protein, IGFBP||Insulin-like growth factor binding protein, N-terminal||Glycoprotein hormone subunit beta, cystine knot||Thrombospondin, type 1 repeat||von Willebrand factor, type C||IGFBP-related, CNN
ENSDARG00000023217	117.162	54.9058	1.0935	4.26e-07	6.2823e-05	crema	cAMP response element binding (CREB) protein||Basic-leucine zipper domain||Coactivator CBP, pKID
ENSDARG00000025428	85.0235	30.5381	1.4773	7.7206e-08	1.266e-05	socs3a	SH2 domain||SOCS protein, C-terminal
ENSDARG00000026039	121.073	56.7883	1.0922	2.8039e-07	4.2972e-05	-//-
ENSDARG00000026771	9.94775	42.4605	-2.0937	6.1031e-06	0.00068472	tmem41ab	-
ENSDARG00000027515	33.2442	2.09165	3.9904	9.9801e-09	1.8872e-06	-//-
ENSDARG00000027744	129.491	52.9187	1.291	1.7613e-09	3.9331e-07	gadd45ba	50S ribosomal protein L30e-like||Ribosomal protein L7Ae/L30e/S12e/Gadd45
ENSDARG00000028027	72.27	173.293	-1.2617	4.3709e-10	1.0458e-07	trim63a	Zinc finger, B-box||Zinc finger, RING-type, conserved site||Zinc finger, RING-type||COS domain
ENSDARG00000028213	1269.23	3277.51	-1.3686	2.4128e-185	1.4144e-181	ttna	Histone H5||Fibronectin type III||Immunoglobulin-like domain||Protein kinase-like domain||Protein kinase domain||Immunoglobulin subtype 2||Immunoglobulin I-set||Tyrosine-protein kinase, active site||Immunoglobulin V-set domain||Immunoglobulin subtype
ENSDARG00000028507	108.83	688.467	-2.6613	6.182e-99	1.6106e-95	itgb4	Integrin beta subunit||Integrin beta subunit, tail||Integrin beta subunit, N-terminal||von Willebrand factor, type A||Plexin-like fold||Fibronectin type III||Na-Ca exchanger/integrin-beta4||EGF-like, conserved site
ENSDARG00000029075	53.7348	208.642	-1.9571	9.9604e-22	4.8657e-19	pfkfb4b	P-loop containing nucleoside triphosphate hydrolase||6-phosphofructo-2-kinase||Phosphoglycerate/bisphosphoglycerate mutase, active site||Histidine phosphatase superfamily, clade-1||Histidine phosphatase superfamily||Fructose-2,6-bisphosphatase
ENSDARG00000030616	31.3737	81.0514	-1.3693	5.0419e-06	0.00058526	nfe2l1a	Basic leucine zipper domain, Maf-type||Transcription factor, Skn-1-like, DNA-binding domain||Basic-leucine zipper domain
ENSDARG00000031683	82.3877	8.68035	3.2466	5.3874e-17	2.0481e-14	fosab	AP-1 transcription factor||Basic-leucine zipper domain||-
ENSDARG00000033140	20.3206	56.5791	-1.4773	5.1201e-05	0.0045476	desi1a	PPPDE putative peptidase domain
ENSDARG00000036239	291.631	137.526	1.0844	2.2164e-15	7.7568e-13	gatm	Amidinotransferase||-
ENSDARG00000036848	95.9915	243.991	-1.3458	5.8333e-15	1.9823e-12	slc43a2a	Major facilitator superfamily||Major facilitator superfamily domain
ENSDARG00000037421	102.963	32.2114	1.6765	1.0905e-10	2.7495e-08	egr1	Zinc finger, C2H2||Protein of unknown function DUF3446||Protein of unknown function DUF3432||Zinc finger, C2H2-like
ENSDARG00000037898	166.476	368.967	-1.1482	4.0823e-17	1.6224e-14	-//-
ENSDARG00000038025	24.9969	68.6061	-1.4566	1.0315e-05	0.0010895	cbx7a	Chromo/chromo shadow domain||Chromo domain||Chromo domain-like||Chromo domain, conserved site||Chromo domain subgroup
ENSDARG00000038401	55.5203	141.396	-1.3486	2.627e-09	5.5999e-07	-//-
ENSDARG00000039677	64.7029	323.787	-2.3231	1.0835e-40	8.7603e-38	dsc2l	Cadherin prodomain||Cadherin-like||Desmoglein||Cadherin, cytoplasmic domain||Cadherin conserved site||Desmosomal cadherin||Cadherin
ENSDARG00000039997	51.5242	105.419	-1.0328	4.1226e-05	0.0037908	ptp4a3	Protein-tyrosine phosphatase, catalytic||Protein-tyrosine phosphatase, receptor/non-receptor type||Protein-tyrosine/Dual specificity phosphatase||Dual specificity phosphatase, catalytic domain||Protein-tyrosine phosphatase-like
ENSDARG00000040277	24.5718	158.129	-2.686	2.7193e-24	1.3861e-21	fbxo32	F-box domain
ENSDARG00000040278	14.624	60.5533	-2.0499	1.0088e-07	1.6202e-05	klhl38b	BTB/POZ-like||BTB/Kelch-associated||BTB/POZ fold||BTB/POZ||BTB-kelch protein||Kelch repeat type 1
ENSDARG00000040284	37.4954	9.93534	1.9161	2.1176e-05	0.0020603	si:dkey-79d12.5	Anti-proliferative protein
ENSDARG00000041169	132.297	513.814	-1.9575	4.486e-51	5.2594e-48	-//-
ENSDARG00000041607	62.6623	145.37	-1.2141	3.124e-08	5.5077e-06	eif4ebp3l	Eukaryotic translation initiation factor 4E binding
ENSDARG00000042667	511.926	80.5285	2.6684	6.8817e-81	1.4669e-77	klf2a	Zinc finger, C2H2||Zinc finger, C2H2-like
ENSDARG00000042725	102.963	33.2572	1.6304	2.4084e-10	5.8824e-08	cebpb	CCAAT/enhancer-binding||Basic-leucine zipper domain
ENSDARG00000044010	6.97192	40.4734	-2.5373	6.3498e-07	8.81e-05	loxl2a	Lysyl oxidase, conserved site||Lysyl oxidase||SRCR domain||SRCR-like domain
ENSDARG00000044212	37.9205	89.941	-1.246	8.6373e-06	0.00093331	CR735126.1	-
ENSDARG00000044853	15.3892	0	4.8792	4.5721e-05	0.0041553	-//-
ENSDARG00000052772	102.538	46.0163	1.1559	8.0698e-07	0.00010875	-//-
ENSDARG00000053853	68.6139	155.2	-1.1776	2.5044e-08	4.5171e-06	slc13a2	Sodium/sulphate symporter
ENSDARG00000054848	29.7582	91.6143	-1.6223	3.0364e-08	5.3937e-06	pdk4	Branched-chain alpha-ketoacid dehydrogenase kinase/Pyruvate dehydrogenase kinase, N-terminal||Histidine kinase-like ATPase, C-terminal domain||Signal transduction histidine kinase-related protein, C-terminal||Signal transduction histidine kinase, core
ENSDARG00000055751	103.304	4.91538	4.3934	3.8072e-25	2.1773e-22	fosb	-||Basic-leucine zipper domain||AP-1 transcription factor
ENSDARG00000055752	39.2808	4.60163	3.0936	1.4678e-08	2.71e-06	npas4a	PAS domain||Myc-type, basic helix-loop-helix (bHLH) domain
ENSDARG00000056875	35.4548	3.86955	3.1957	4.7822e-08	8.1661e-06	-//-
ENSDARG00000057726	40.6412	105.628	-1.378	1.6426e-07	2.5892e-05	-//-
ENSDARG00000058285	39.791	89.6272	-1.1715	2.4818e-05	0.0023655	cpt1b	Acyltransferase ChoActase/COT/CPT
ENSDARG00000058606	239.681	45.1796	2.4074	6.2103e-35	4.5506e-32	SIK1	Protein kinase, ATP binding site||Protein kinase-like domain||Protein kinase domain||Serine/threonine-protein kinase, active site||Serine/threonine/dual specificity protein kinase, catalytic domain||Ubiquitin-associated/translation elongation factor EF1B, N-terminal, eukaryote
ENSDARG00000060316	40.2161	8.88951	2.1776	1.8792e-06	0.00023563	cish	SH2 domain||-||SOCS protein, C-terminal
ENSDARG00000061081	24.5718	67.2466	-1.4525	1.32e-05	0.0013457	arpp21	SUZ domain||Single-stranded nucleic acid binding R3H
ENSDARG00000061764	868.515	2434.05	-1.4867	3.0665e-157	1.4381e-153	ahnak	Prismane-like||PDZ domain
ENSDARG00000062913	16.3245	106.465	-2.7053	5.4155e-17	2.0481e-14	-//-
ENSDARG00000063572	208.222	524.9	-1.3339	5.9074e-30	3.7437e-27	perp	PMP-22/EMP/MP20/Claudin superfamily
ENSDARG00000068288	7.05695	69.0245	-3.29	9.9322e-14	3.0246e-11	lamc2	-||EGF-like, laminin||Laminin B, subgroup||Laminin B type IV
ENSDARG00000069377	54.7551	14.6416	1.9029	3.1231e-07	4.6943e-05	si:dkey-242g16.2	Putative phosphatase regulatory subunit
ENSDARG00000069946	61.3019	431.821	-2.8164	1.2061e-66	1.8853e-63	itga6b	-||Integrin alpha-2||Integrin alpha chain||Integrin alpha beta-propellor||Integrin alpha chain, C-terminal cytoplasmic region, conserved site
ENSDARG00000069983	130.086	63.2724	1.0398	2.9311e-07	4.4629e-05	-//-
ENSDARG00000070212	1150.96	22.9036	5.6511	1.4171e-278	3.3228e-274	-//-
ENSDARG00000074168	54.5	118.178	-1.1166	3.367e-06	0.00040486	fam208b	Protein of unknown function DUF3715||-
ENSDARG00000074526	6.97192	48.0034	-2.7835	1.1074e-08	2.0608e-06	zbtb16b	BTB/POZ fold||BTB/POZ-like||Zinc finger, C2H2||BTB/POZ||Zinc finger, C2H2-like
ENSDARG00000074580	28.0577	78.1231	-1.4774	1.9437e-06	0.00024242	-//-
ENSDARG00000076927	62.4072	125.708	-1.0103	1.1263e-05	0.001179	-//-
ENSDARG00000077236	6.8869	32.1068	-2.221	4.3573e-05	0.003991	hspb6	Alpha crystallin/Hsp20 domain||HSP20-like chaperone||Alpha crystallin/Heat shock protein
ENSDARG00000077473	102.028	35.4535	1.525	1.7509e-09	3.9331e-07	mych	Myc-type, basic helix-loop-helix (bHLH) domain||Transcription regulator Myc||Transcription regulator Myc, N-terminal
ENSDARG00000077651	8.07723	69.3382	-3.1017	3.9549e-13	1.1449e-10	-//-
ENSDARG00000078529	52.5445	19.6615	1.4182	4.0689e-05	0.0037562	adgrb1b	GPCR, family 2, brain-specific angiogenesis inhibitor||GPCR, family 2, secretin-like||Thrombospondin, type 1 repeat||GPCR, family 2, extracellular hormone receptor domain||GPCR, family 2-like||Domain of unknown function DUF3497||GPS motif
ENSDARG00000079011	57.3908	128.741	-1.1656	4.8592e-07	6.8638e-05	col17a1b	Collagen triple helix repeat||-
ENSDARG00000079230	32.2239	80.3194	-1.3176	1.0697e-05	0.0011247	-//-
ENSDARG00000079922	27.1225	3.13748	3.1118	2.3604e-06	0.00028827	klf4	Zinc finger, C2H2
ENSDARG00000087303	344.77	168.901	1.0295	1.1835e-16	4.4049e-14	cebpd	CCAAT/enhancer-binding||Basic-leucine zipper domain
ENSDARG00000088371	66.5734	27.1915	1.2918	1.5803e-05	0.0015836	-//-
ENSDARG00000088432	76.3511	32.7343	1.2218	9.1084e-06	0.00097079	si:dkey-162h11.3	SEA domain
ENSDARG00000088436	209.583	1.88249	6.7987	9.8514e-51	1.1e-47	-//-
ENSDARG00000088813	12.1584	64.1091	-2.3986	1.3516e-09	3.107e-07	ppp1r3ab	Putative phosphatase regulatory subunit
ENSDARG00000089885	26.5273	77.4956	-1.5466	9.0079e-07	0.00011933	slc16a12b	Major facilitator superfamily domain||Major facilitator superfamily
ENSDARG00000091090	55.3503	114.309	-1.0463	1.5688e-05	0.0015788	xirp2b	Zinc finger, LIM-type||Actin-binding, Xin repeat
ENSDARG00000091260	66.4033	166.182	-1.3234	2.0745e-10	5.1748e-08	mylk4a	Serine/threonine-protein kinase, active site||Serine/threonine/dual specificity protein kinase, catalytic domain||Protein kinase, ATP binding site||Protein kinase-like domain||Protein kinase domain
ENSDARG00000091600	35.5398	95.0655	-1.4195	3.6448e-07	5.4435e-05	-//-
ENSDARG00000091669	39.1958	5.75204	2.7686	7.8889e-08	1.2846e-05	si:dkey-17e16.17	-
ENSDARG00000091691	5.95164	35.8718	-2.5915	2.072e-06	0.00025706	-//-
ENSDARG00000091715	144.285	62.122	1.2157	1.2214e-09	2.8356e-07	si:dkey-162h11.2	SEA domain
ENSDARG00000091744	31.2036	0	5.2209	4.928e-09	9.9613e-07	-//-
ENSDARG00000091801	50.2489	152.481	-1.6015	1.4749e-12	4.2176e-10	serpinb14	Serpin domain||Serpin, conserved site
ENSDARG00000093237	2.97582	37.5451	-3.6573	9.7309e-09	1.8551e-06	si:ch211-89o9.4	-
ENSDARG00000093584	38.3456	91.1959	-1.2499	7.0765e-06	0.00078517	zgc:193505	-
ENSDARG00000093857	11.3081	60.5533	-2.4208	3.1459e-09	6.6455e-07	si:dkey-79f11.10	P-loop containing nucleoside triphosphate hydrolase||Mitochondrial Rho-like
ENSDARG00000097717	50.674	13.5957	1.8981	8.9465e-07	0.00011919	-//-
