# Supplementary material for: Impact of Lactobacillus casei BL23 on the Host Transcriptome, Growth and Disease Resistance in Larval Zebrafish
Source: Front Physiol. 2018 Sep 4;9:1245. doi: 10.3389/fphys.2018.01245 (PMC6131626; doi:10.3389/fphys.2018.01245)
Supplement: TABLE S3 — Difference of genes expression between control group and treatment group zebrafish at 35 dpf. [file Table_3.XLSX]

## Sheet: Sheet1
Gene_id	readcount_ZFGBL23	readcount_ZFGCK	log2.Fold_change.	pvalue	qvalue	Gene Name	Description
ENSDARG00000000103	108.585	49.2393	1.1409	2.5465e-06	0.00010525	myh10	P-loop containing nucleoside triphosphate hydrolase||Myosin, N-terminal, SH3-like||Myosin head, motor domain||IQ motif, EF-hand binding site||Myosin tail
ENSDARG00000001818	530.196	217.218	1.2874	2.1283e-30	5.1137e-28	c3b.2	Terpenoid cyclases/protein prenyltransferase alpha-alpha toroid||Netrin module, non-TIMP type||Tissue inhibitor of metalloproteinases-like, OB-fold||Netrin domain||Alpha-macroglobulin, receptor-binding||Alpha-macroglobulin complement component||Alpha-2-macroglobulin, N-terminal||Alpha-2-macroglobulin, N-terminal 2||Alpha-2-macroglobulin, thiol-ester bond-forming||Alpha-2-macroglobulin
ENSDARG00000001915	63.3636	25.3461	1.3219	5.2517e-05	0.0017037	-//-
ENSDARG00000002210	36.9169	96.622	-1.3881	9.9239e-08	4.9882e-06	stk25a	Serine/threonine/dual specificity protein kinase, catalytic domain||Protein kinase domain||Protein kinase-like domain||Protein kinase, ATP binding site
ENSDARG00000002597	56.955	16.2248	1.8116	1.2619e-06	5.4855e-05	pabpc1l	RNA recognition motif domain||RNA recognition motif domain, eukaryote||Polyadenylate binding protein, human types 1, 2, 3, 4||Polyadenylate-binding protein/Hyperplastic disc protein
ENSDARG00000002768	109.487	454.697	-2.0541	5.0784e-52	2.8471e-49	pvalb2	EF-Hand 1, calcium-binding site||EF-hand domain||EF-hand domain pair
ENSDARG00000003523	22.0238	68.2893	-1.6326	4.6599e-07	2.1865e-05	itln3	Fibrinogen, alpha/beta/gamma chain, C-terminal globular domain
ENSDARG00000003701	96.67	32.7724	1.5606	1.4231e-08	8.3643e-07	cldng	Claudin||Claudin, conserved site||PMP-22/EMP/MP20/Claudin superfamily
ENSDARG00000004060	209.858	70.3073	1.5777	3.6753e-17	4.566e-15	bhlhe40	Myc-type, basic helix-loop-helix (bHLH) domain||Orange
ENSDARG00000004094	83.2211	182.508	-1.1329	3.7103e-10	2.5273e-08	acsbg2	AMP-binding, conserved site||AMP-dependent synthetase/ligase
ENSDARG00000004402	123.658	53.8403	1.1996	1.7018e-07	8.2874e-06	elovl6	ELO family
ENSDARG00000004904	157.958	73.3746	1.1062	3.1731e-08	1.7459e-06	gys2	Glycogen synthase
ENSDARG00000004952	120.77	36.4855	1.7269	8.9677e-12	7.0279e-10	rsad2	Elongator protein 3/MiaB/NifB||Radical SAM||Antiviral radical SAM protein viperin
ENSDARG00000004979	131.24	53.5982	1.292	1.0891e-08	6.4707e-07	elovl5	ELO family
ENSDARG00000005355	69.3208	29.4629	1.2344	6.1676e-05	0.0019716	larp6	RNA-binding protein Lupus La||Lupus La protein||SUZ-C domain
ENSDARG00000005578	259.863	115.107	1.1748	9.0848e-14	8.5991e-12	ugp2a	Nucleotide-diphospho-sugar transferases||UTP--glucose-1-phosphate uridylyltransferase||UTP--glucose-1-phosphate uridylyltransferase family
ENSDARG00000006372	40.7079	11.543	1.8183	4.0067e-05	0.0013437	ugt5c2	UDP-glucuronosyl/UDP-glucosyltransferase
ENSDARG00000006526	4795.59	2034.07	1.2373	3.9182e-245	1.0709e-241	fn1b	Fibronectin type III||Kringle-like fold||Fibronectin, type I||Fibronectin, type II, collagen-binding
ENSDARG00000006580	148.209	54.8897	1.433	4.5613e-11	3.439e-09	cldnd	Claudin||PMP-22/EMP/MP20/Claudin superfamily||Claudin, conserved site
ENSDARG00000006901	67.1545	24.216	1.4715	6.1104e-06	0.00024029	AEBP1 (1 of 2)	Immunoglobulin subtype||Peptidase M14, carboxypeptidase A||Immunoglobulin I-set||Coagulation factor 5/8 C-terminal type domain||Carboxypeptidase-like, regulatory domain||Immunoglobulin-like domain||Galactose-binding domain-like
ENSDARG00000007534	34.5701	8.15274	2.0842	3.3489e-05	0.001137	itln1	Fibrinogen, alpha/beta/gamma chain, C-terminal globular domain
ENSDARG00000007836	144.328	391.089	-1.4381	3.5691e-28	7.8039e-26	ctsla	Proteinase inhibitor I29, cathepsin propeptide||Peptidase C1A, papain C-terminal||Cysteine peptidase, histidine active site||Cysteine peptidase, asparagine active site||Cysteine peptidase, cysteine active site
ENSDARG00000007988	108.855	53.5982	1.0222	1.7129e-05	0.00062421	masp2	EGF-like calcium-binding, conserved site||Peptidase S1A, complement C1r/C1S/mannan-binding||EGF-like, conserved site||CUB domain||Peptidase S1A, chymotrypsin-type||EGF-like calcium-binding domain||Sushi/SCR/CCP domain||EGF-type aspartate/asparagine hydroxylation site||Peptidase S1, trypsin family, active site||Peptidase S1||Trypsin-like cysteine/serine peptidase domain
ENSDARG00000008454	83.9432	22.8438	1.8776	1.6404e-09	1.0488e-07	cpeb1b	RNA recognition motif domain||-
ENSDARG00000008835	144.509	44.5575	1.6974	1.6869e-13	1.5695e-11	A2ML1 (1 of 13)	Alpha-2-macroglobulin, conserved site||Terpenoid cyclases/protein prenyltransferase alpha-alpha toroid||Immunoglobulin E-set||Alpha-macroglobulin, receptor-binding||Alpha-2-macroglobulin||Alpha-2-macroglobulin, N-terminal 2||Alpha-2-macroglobulin, thiol-ester bond-forming||Alpha-macroglobulin complement component||Alpha-2-macroglobulin, N-terminal
ENSDARG00000008948	6.13778	31.0773	-2.3401	1.7374e-05	0.00063077	PLA2G3 (1 of 2)	Phospholipase A2||Phospholipase A2 domain||Phospholipase A2, active site
ENSDARG00000009443	3259.07	712.598	2.1933	0	0	zgc:92137	Alpha-amylase, C-terminal all beta||Glycosyl hydrolase, family 13, catalytic domain||Glycosyl hydrolase, family 13, subfamily, catalytic domain||Alpha amylase||Glycoside hydrolase superfamily
ENSDARG00000009933	33.8481	75.0698	-1.1492	4.8339e-05	0.0015846	-//-
ENSDARG00000010146	219.516	93.3125	1.2342	1.0135e-12	8.7594e-11	cpa2	Proteinase inhibitor, propeptide||Proteinase inhibitor, carboxypeptidase propeptide||Peptidase M14, carboxypeptidase A
ENSDARG00000010155	24.0998	62.5581	-1.3762	2.0469e-05	0.00073492	abi1a	Target SNARE coiled-coil domain||Abl-interactor, homeo-domain homologous domain||SH3 domain
ENSDARG00000010332	67.7864	24.2968	1.4802	5.0164e-06	0.00019979	zgc:56231	Kinesin motor domain||Kinesin motor domain, conserved site||P-loop containing nucleoside triphosphate hydrolase
ENSDARG00000011170	77.4443	35.3554	1.1312	7.9744e-05	0.0025233	ndrg2	Alpha/Beta hydrolase fold||NDRG
ENSDARG00000011661	39.1735	99.6087	-1.3464	1.2393e-07	6.1724e-06	twf1b	Actin-depolymerising factor homology domain
ENSDARG00000011703	50.6367	116.802	-1.2058	1.4192e-07	7.0364e-06	clocka	PAS fold||PAC motif||Nuclear translocator||PAS domain||Myc-type, basic helix-loop-helix (bHLH) domain
ENSDARG00000012076	6019.72	13295.3	-1.1431	0	0	apoa1a	Apolipoprotein A/E
ENSDARG00000012600	81.5964	38.5035	1.0835	9.3031e-05	0.0029101	HELZ2 (2 of 3)	Nucleic acid-binding, OB-fold||P-loop containing nucleoside triphosphate hydrolase||AAA+ ATPase domain
ENSDARG00000012609	2609.64	819.068	1.6718	4.424e-211	9.6731e-208	hpx	Hemopexin-like repeats||Hemopexin, chordata||Hemopexin-like domain
ENSDARG00000012640	50.1854	118.497	-1.2395	6.1289e-08	3.2136e-06	cideb	CIDE-N domain
ENSDARG00000012944	57.9479	164.266	-1.5032	1.7386e-13	1.6108e-11	myhz2	P-loop containing nucleoside triphosphate hydrolase||Myosin, N-terminal, SH3-like||Myosin head, motor domain||IQ motif, EF-hand binding site||Myosin tail
ENSDARG00000013252	52.9835	113.573	-1.1	1.3738e-06	5.913e-05	TMC5	TMC
ENSDARG00000014320	71.3968	149.252	-1.0638	7.0394e-08	3.6473e-06	gucy2c	Serine-threonine/tyrosine-protein kinase catalytic domain||Extracellular ligand-binding receptor||Adenylyl cyclase class-3/4/guanylyl cyclase, conserved site||Adenylyl cyclase class-3/4/guanylyl cyclase||Protein kinase domain||Protein kinase-like domain||Nucleotide cyclase||Periplasmic binding protein-like I
ENSDARG00000014556	235.853	552.207	-1.2273	4.0115e-31	9.8552e-29	serpinb1l3	Serpin domain||Serpin, conserved site
ENSDARG00000014646	531.46	253.3	1.0691	5.8968e-23	1.0482e-20	aoc2	Copper amine oxidase, C-terminal||Copper amine oxidase, N2-terminal||Copper amine oxidase, N-terminal||Copper amine oxidase, N3-terminal||Copper amine oxidase
ENSDARG00000015626	80.9645	29.5436	1.4544	8.5651e-07	3.8298e-05	-//-
ENSDARG00000015911	87.0121	37.3734	1.2192	8.8244e-06	0.00034029	-//-
ENSDARG00000015955	101.003	205.998	-1.0282	7.1685e-10	4.7497e-08	cldnc	PMP-22/EMP/MP20/Claudin superfamily||Claudin||Claudin-3
ENSDARG00000016290	276.02	636.075	-1.2044	1.2747e-34	3.6673e-32	clca1	Domain of unknown function DUF1973||von Willebrand factor, type A||Chloride channel calcium-activated
ENSDARG00000016908	157.958	55.6969	1.5039	1.7757e-12	1.5049e-10	zgc:171779	Zona pellucida domain
ENSDARG00000017441	87.1926	189.127	-1.1171	2.8297e-10	1.9579e-08	mylz3	EF-hand domain
ENSDARG00000017444	203.991	97.1064	1.0709	9.3872e-10	6.1452e-08	hal	Histidine ammonia-lyase||Protein of unknown function DUF3534||Phenylalanine/histidine ammonia-lyases, active site||Aromatic amino acid lyase||L-Aspartase-like
ENSDARG00000017489	38.1806	10.09	1.9199	3.6468e-05	0.0012324	zgc:123068	Interferon alpha-inducible protein 6/27
ENSDARG00000017676	89.0881	40.5215	1.1365	2.1599e-05	0.00077042	mmp2	Peptidase M10, metallopeptidase||Peptidase M10A, cysteine switch, zinc binding site||Peptidoglycan binding-like||Hemopexin-like repeats||Peptidase M10A||Peptidase, metallopeptidase||Kringle-like fold||Hemopexin-like domain||Fibronectin, type II, collagen-binding
ENSDARG00000017773	65.9811	19.2114	1.7801	2.5789e-07	1.2393e-05	slc16a12a	Major facilitator superfamily||Major facilitator superfamily domain
ENSDARG00000018478	261.217	100.9	1.3723	2.7858e-17	3.5007e-15	agxtb	Pyridoxal phosphate-dependent transferase||Aminotransferase class-V, pyridoxal-phosphate binding site||Aminotransferase class V domain||Serine-pyruvate aminotransferase/2-aminoethylphosphonate-pyruvate transaminase
ENSDARG00000018587	41.5203	5.24681	2.9843	2.3418e-08	1.3231e-06	zgc:152658	P-loop containing nucleoside triphosphate hydrolase||AIG1-type guanine nucleotide-binding (G) domain
ENSDARG00000018846	551.588	1163.42	-1.0767	3.5522e-52	2.0439e-49	dgat2	Diacylglycerol acyltransferase
ENSDARG00000019492	311.853	153.368	1.0239	3.1506e-13	2.8466e-11	shbg	Concanavalin A-like lectin/glucanase domain||Laminin G domain
ENSDARG00000019521	17.5107	313.598	-4.1626	1.1753e-69	1.0279e-66	mpx	Haem peroxidase, animal||Tumour necrosis factor-like domain||Complement C1q protein||Haem peroxidase
ENSDARG00000019706	89.2686	31.8037	1.489	1.4331e-07	7.0894e-06	zar1	Zinc-binding domain
ENSDARG00000019763	71.5773	23.7317	1.5927	7.295e-07	3.3092e-05	acp5a	Metallo-dependent phosphatase-like||Acid phosphatase, type 5||Calcineurin-like phosphoesterase domain, apaH type
ENSDARG00000020212	40.5274	82.8996	-1.0325	8.7829e-05	0.0027631	slc1a1	Sodium:dicarboxylate symporter||-||Sodium:dicarboxylate symporter, conserved site
ENSDARG00000020781	83.5821	40.6022	1.0416	0.00012946	0.0039259	-//-
ENSDARG00000020876	149.202	68.7736	1.1173	5.9346e-08	3.1267e-06	pdk2a	Branched-chain alpha-ketoacid dehydrogenase kinase/Pyruvate dehydrogenase kinase, N-terminal||Signal transduction histidine kinase, core||Histidine kinase-like ATPase, C-terminal domain
ENSDARG00000020994	66.7935	146.507	-1.1332	1.9683e-08	1.1385e-06	wu:fb63a08	Concanavalin A-like lectin/glucanase domain||MAM domain
ENSDARG00000021004	622.804	268.072	1.2162	1.7358e-32	4.5182e-30	c5	Alpha-macroglobulin, receptor-binding||Netrin module, non-TIMP type||Netrin domain||Tissue inhibitor of metalloproteinases-like, OB-fold||Terpenoid cyclases/protein prenyltransferase alpha-alpha toroid||Alpha-2-macroglobulin, N-terminal||Alpha-macroglobulin complement component||Anaphylatoxin/fibulin||Alpha-2-macroglobulin||Anaphylatoxin, complement system||Alpha-2-macroglobulin, N-terminal 2
ENSDARG00000021172	504.381	220.447	1.1941	6.7571e-26	1.3431e-23	cyp2ad2	Cytochrome P450, E-class, group I, CYP2D-like||Cytochrome P450, E-class, group I||Cytochrome P450, conserved site||Cytochrome P450
ENSDARG00000021208	210.67	100.819	1.0632	6.3356e-10	4.2234e-08	serpind1	Serpin, conserved site||Serpin domain
ENSDARG00000022712	80.9645	244.824	-1.5964	5.8583e-21	9.631e-19	stat3	p53-like transcription factor, DNA-binding||STAT transcription factor, protein interaction||STAT transcription factor, DNA-binding||SH2 domain||STAT transcription factor, coiled coil||STAT transcription factor, all-alpha domain
ENSDARG00000023479	100.371	36.0819	1.476	2.9941e-08	1.6573e-06	lrp13	EGF-like calcium-binding domain||LDLR class B repeat||EGF-type aspartate/asparagine hydroxylation site||Low-density lipoprotein (LDL) receptor class A, conserved site||Insulin-like growth factor binding protein, N-terminal||EGF-like calcium-binding, conserved site||EGF-like, conserved site||Epidermal growth factor-like domain||Low-density lipoprotein (LDL) receptor class A repeat||Phospholipase D…
ENSDARG00000023624	27.259	84.0297	-1.6242	2.5449e-08	1.4231e-06	-//-
ENSDARG00000023768	21.8433	63.6075	-1.542	3.0141e-06	0.00012342	mfsd4a	Major facilitator superfamily||Major facilitator superfamily domain
ENSDARG00000024032	31.0499	1.2108	4.6806	1.5301e-08	8.9695e-07	coch	LCCL domain||von Willebrand factor, type A
ENSDARG00000024928	1104.98	500.465	1.1427	4.6106e-51	2.5203e-48	-//-
ENSDARG00000025386	49.1925	15.4176	1.6739	2.0644e-05	0.00073877	lsm14b	TFG box||FDF domain||Like-Sm (LSM) domain||DFDF domain||Lsm14 N-terminal||FFD box
ENSDARG00000025903	40.6177	91.8595	-1.1773	4.6264e-06	0.00018459	lgals9l1	Galectin, carbohydrate recognition domain||Concanavalin A-like lectin/glucanase domain
ENSDARG00000026039	300.751	63.9304	2.234	1.923e-37	6.1834e-35	-//-
ENSDARG00000026335	34.6604	82.2538	-1.2468	5.8469e-06	0.00023035	susd4	Sushi/SCR/CCP domain
ENSDARG00000026759	6.76961	29.2207	-2.1098	9.143e-05	0.0028682	ldlrb	EGF-like calcium-binding domain||EGF-type aspartate/asparagine hydroxylation site||LDLR class B repeat||Low-density lipoprotein (LDL) receptor class A, conserved site||EGF-like calcium-binding, conserved site||-||EGF-like, conserved site||Low-density lipoprotein (LDL) receptor class A repeat||Epidermal growth factor-like domain
ENSDARG00000026787	16.0665	72.8096	-2.1801	2.9335e-10	2.0234e-08	aqp7	Major intrinsic protein||Aquaporin-like
ENSDARG00000027065	77.0833	30.1086	1.3562	5.3407e-06	0.00021193	slc38a3a	Amino acid transporter, transmembrane domain
ENSDARG00000027639	185.578	63.1232	1.5558	4.5405e-15	4.8666e-13	zgc:165539	C2 domain||-
ENSDARG00000028163	115.535	56.9884	1.0196	9.8731e-06	0.0003774	prg4b	Hemopexin-like domain||Hemopexin-like repeats||Somatomedin B domain||Hemopexin, conserved site||Somatomedin B, chordata
ENSDARG00000028731	9.65798	36.4048	-1.9143	4.0899e-05	0.0013674	stat4	SH2 domain||STAT transcription factor, protein interaction||p53-like transcription factor, DNA-binding||STAT transcription factor, DNA-binding||STAT transcription factor, all-alpha domain||STAT transcription factor, coiled coil
ENSDARG00000029230	313.659	153.288	1.033	1.7939e-13	1.655e-11	pnp4b	Purine nucleoside phosphorylase I, inosine/guanosine-specific||Nucleoside phosphorylase domain||Purine nucleoside phosphorylase
ENSDARG00000029388	102.718	42.9431	1.2582	7.3523e-07	3.3283e-05	LRG1	Leucine-rich repeat, typical subtype||Leucine-rich repeat
ENSDARG00000029493	58.2186	23.086	1.3345	9.4088e-05	0.0029389	f9b	Peptidase S1A, chymotrypsin-type||Epidermal growth factor-like domain||Gamma-carboxyglutamic acid-rich (GLA) domain||EGF-like calcium-binding, conserved site||EGF-like, conserved site||Peptidase S1A, coagulation factor VII/IX/X/C/Z||Peptidase S1||Trypsin-like cysteine/serine peptidase domain||EGF-like calcium-binding domain||Peptidase S1, trypsin family, active site||EGF-type aspartate/asparagine…
ENSDARG00000029822	657.645	238.528	1.4632	4.128e-45	1.9204e-42	cel.2	Alpha/Beta hydrolase fold||Cholinesterase||Carboxylesterase, type B||Carboxylesterase type B, active site||Carboxylesterase type B, conserved site
ENSDARG00000029995	14.9834	60.7823	-2.0203	4.0269e-08	2.1687e-06	tnni2b.2	Troponin
ENSDARG00000030530	84.3945	38.8264	1.1201	4.4055e-05	0.0014595	slc22a2	Organic cation transport protein||Sugar transporter, conserved site||Major facilitator superfamily domain||General substrate transporter
ENSDARG00000030616	26.5369	74.989	-1.4987	6.8045e-07	3.106e-05	nfe2l1a	Basic leucine zipper domain, Maf-type||Transcription factor, Skn-1-like, DNA-binding domain||Basic-leucine zipper domain
ENSDARG00000030893	229.986	478.428	-1.0568	7.9624e-22	1.3496e-19	-//-
ENSDARG00000031228	165.54	77.0878	1.1026	1.6263e-08	9.5077e-07	podxl	Podocalyxin||CD34/Podocalyxin
ENSDARG00000031422	80.8743	29.3821	1.4607	7.9959e-07	3.6047e-05	igfbp2b	Thyroglobulin type-1||Insulin-like growth factor binding protein, N-terminal||Insulin-like growth factor binding protein 2||Insulin-like growth factor-binding protein, IGFBP||Insulin-like growth factor binding protein, N-terminal, Cys-rich conserved site||Insulin-like growth factor-binding protein family 1-6, chordata
ENSDARG00000031647	299.217	126.085	1.2468	4.8215e-17	5.9128e-15	stat2	STAT transcription factor, DNA-binding||p53-like transcription factor, DNA-binding||STAT transcription factor, protein interaction||SH2 domain||STAT transcription factor, coiled coil||STAT transcription factor, all-alpha domain
ENSDARG00000031683	3.70072	47.6249	-3.6858	3.7033e-11	2.8018e-09	fosab	AP-1 transcription factor||Basic-leucine zipper domain||-
ENSDARG00000032768	45.582	120.677	-1.4046	1.8859e-09	1.2022e-07	-//-
ENSDARG00000033683	47.8386	140.615	-1.5555	2.8062e-12	2.3241e-10	tpma	Tropomyosin
ENSDARG00000033824	171.587	46.9791	1.8688	8.4235e-18	1.1299e-15	-//-
ENSDARG00000034989	179.801	54.1632	1.731	7.5246e-17	9.0399e-15	retsatl	-
ENSDARG00000035171	40.5274	12.9152	1.6498	0.00013108	0.0039697	btg4	Anti-proliferative protein
ENSDARG00000035869	200.11	633.492	-1.6625	1.5925e-54	1.0241e-51	azin1b	PLP-binding barrel||Orn/DAP/Arg decarboxylase 2, N-terminal||Orn/DAP/Arg decarboxylase 2, conserved site||Orn/DAP/Arg decarboxylase 2, C-terminal||Alanine racemase/group IV decarboxylase, C-terminal||Ornithine/DAP/Arg decarboxylase||Ornithine decarboxylase
ENSDARG00000035909	33.5773	116.076	-1.7895	2.5204e-12	2.1034e-10	mfsd2ab	Major facilitator superfamily domain
ENSDARG00000036041	1149.39	542.036	1.0844	8.2707e-49	4.11e-46	f2	Peptidase S1, trypsin family, active site||Kringle||Peptidase S1||Kringle, conserved site||Trypsin-like cysteine/serine peptidase domain||Kringle-like fold||Gamma-carboxyglutamic acid-rich (GLA) domain||Thrombin light chain||Peptidase S1A, chymotrypsin-type||Prothrombin/thrombin
ENSDARG00000036084	14.8029	88.3886	-2.578	1.9455e-14	1.9579e-12	itln2	Fibrinogen, alpha/beta/gamma chain, C-terminal globular domain
ENSDARG00000036135	98.385	45.7683	1.1041	1.3084e-05	0.00048986	bbox1	Domain of unknown function DUF971||Taurine catabolism dioxygenase TauD/TfdA
ENSDARG00000036239	1450.32	711.306	1.0278	4.7117e-56	3.2194e-53	gatm	Amidinotransferase||-
ENSDARG00000036427	398.775	875.087	-1.1339	6.5304e-43	2.7459e-40	slc3a2a	Glycoside hydrolase superfamily||Glycosyl hydrolase, family 13, subfamily, catalytic domain||Glycosyl hydrolase, family 13, catalytic domain
ENSDARG00000036463	46.2139	95.0076	-1.0397	2.4183e-05	0.00085145	cldn15a	PMP-22/EMP/MP20/Claudin superfamily||Claudin, conserved site||Claudin
ENSDARG00000036864	144.779	484.725	-1.7433	6.9905e-45	3.082e-42	slc34a2b	Sodium-dependent phosphate transport protein
ENSDARG00000036942	121.582	292.772	-1.2678	4.6722e-18	6.5069e-16	gpd1c	Glycerol-3-phosphate dehydrogenase, NAD-dependent, N-terminal||Glycerol-3-phosphate dehydrogenase, NAD-dependent, eukaryotic||6-phosphogluconate dehydrogenase C-terminal domain-like||Glycerol-3-phosphate dehydrogenase, NAD-dependent, C-terminal||Glycerol-3-phosphate dehydrogenase, NAD-dependent
ENSDARG00000036993	84.7555	172.015	-1.0212	2.1457e-08	1.2314e-06	erbb3b	Furin-like cysteine-rich domain||Serine-threonine/tyrosine-protein kinase catalytic domain||Receptor L-domain||Insulin-like growth factor binding protein, N-terminal||Protein kinase-like domain||Protein kinase, ATP binding site||Protein kinase domain||Furin-like repeat||Tyrosine protein kinase, EGF/ERB/XmrK receptor
ENSDARG00000037191	162.832	81.1238	1.0052	2.1631e-07	1.0418e-05	ttr	Transthyretin/hydroxyisourate hydrolase||Transthyretin/hydroxyisourate hydrolase, superfamily
ENSDARG00000037421	23.2875	91.2945	-1.971	3.5539e-11	2.6981e-09	egr1	Zinc finger, C2H2||Protein of unknown function DUF3446||Protein of unknown function DUF3432||Zinc finger, C2H2-like
ENSDARG00000037789	76.1807	236.591	-1.6349	5.9708e-21	9.7426e-19	pvalb1	EF-hand domain pair||EF-hand domain||EF-Hand 1, calcium-binding site
ENSDARG00000037836	95.1356	41.8938	1.1832	5.733e-06	0.00022682	igfals	Leucine-rich repeat||Leucine-rich repeat, typical subtype||Leucine-rich repeat-containing N-terminal
ENSDARG00000038720	90.3517	36.2434	1.3178	1.453e-06	6.2293e-05	si:ch211-14a17.7	Zona pellucida domain
ENSDARG00000039243	264.105	20.4222	3.6929	9.6397e-54	5.8548e-51	zgc:152791	Interferon alpha-inducible protein 6/27
ENSDARG00000039351	48.9217	110.99	-1.1819	4.4e-07	2.0734e-05	ccl19b	Chemokine interleukin-8-like domain
ENSDARG00000039605	210.399	100.335	1.0683	5.5571e-10	3.7272e-08	mat1a	S-adenosylmethionine synthetase, C-terminal||S-adenosylmethionine synthetase, conserved site||S-adenosylmethionine synthetase||S-adenosylmethionine synthetase, central domain||S-adenosylmethionine synthetase, N-terminal||S-adenosylmethionine synthetase superfamily
ENSDARG00000039752	6.76961	30.9158	-2.1912	3.7971e-05	0.0012793	si:ch73-308m11.1	AIG1-type guanine nucleotide-binding (G) domain||P-loop containing nucleoside triphosphate hydrolase
ENSDARG00000039828	234.229	83.4646	1.4887	1.5812e-17	2.0404e-15	zp3b	Zona pellucida domain
ENSDARG00000040022	52.4419	16.7898	1.6431	1.4404e-05	0.000532	-//-
ENSDARG00000040344	119.957	45.3647	1.4029	5.6121e-09	3.4372e-07	-//-
ENSDARG00000040424	60.6557	124.793	-1.0408	1.277e-06	5.5401e-05	-//-
ENSDARG00000040510	75.0975	21.2294	1.8227	2.2993e-08	1.3025e-06	ca15b	Carbonic anhydrase, alpha-class, conserved site||-||Alpha carbonic anhydrase
ENSDARG00000040780	94.4135	46.9791	1.007	7.6915e-05	0.0024373	-//-
ENSDARG00000040815	94.8648	38.5035	1.3009	1.0271e-06	4.5459e-05	tsku	Leucine-rich repeat||Leucine-rich repeat, typical subtype
ENSDARG00000040890	120.409	55.4548	1.1186	1.0936e-06	4.7822e-05	fdps	Isoprenoid synthase domain||Polyprenyl synthetase
ENSDARG00000041554	62.0999	139.565	-1.1683	1.9905e-08	1.1483e-06	unc93a	Ion channel regulatory protein, UNC-93||Major facilitator superfamily domain
ENSDARG00000041595	1037.01	485.29	1.0955	6.2697e-45	2.856e-42	ces3	Carboxylesterase type B, active site||Carboxylesterase type B, conserved site||Alpha/Beta hydrolase fold||Carboxylesterase, type B
ENSDARG00000041685	594.101	225.774	1.3958	3.4133e-38	1.1846e-35	A2ML1 (3 of 13)	Alpha-2-macroglobulin, conserved site||Terpenoid cyclases/protein prenyltransferase alpha-alpha toroid||Alpha-macroglobulin, receptor-binding||Immunoglobulin E-set||Alpha-2-macroglobulin||Alpha-2-macroglobulin, thiol-ester bond-forming||Alpha-2-macroglobulin, N-terminal 2||Alpha-macroglobulin complement component||Alpha-2-macroglobulin, N-terminal
ENSDARG00000041699	32.1331	7.82986	2.037	8.1415e-05	0.0025687	piwil1	Ribonuclease H-like domain||PAZ domain||Piwi domain
ENSDARG00000042129	184.765	69.1772	1.4173	3.0948e-13	2.8078e-11	zp3a.1	Zona pellucida domain
ENSDARG00000042130	165.178	60.7823	1.4423	2.8342e-12	2.3385e-10	zp3a.2	Zona pellucida domain
ENSDARG00000042583	59.6628	20.4222	1.5467	9.63e-06	0.00037005	-//-
ENSDARG00000042684	541.298	263.309	1.0397	2.3246e-22	4.0339e-20	serpinc1	Serpin, conserved site||Serpin domain
ENSDARG00000042780	2615.51	885.985	1.5617	1.0679e-191	2.1227e-188	apoba	Lipid transport protein, beta-sheet shell||Lipid transport, open beta-sheet||Vitellinogen, open beta-sheet||Lipid transport protein, N-terminal
ENSDARG00000042953	154.979	74.989	1.0473	1.6427e-07	8.0214e-06	cyp2n13	Cytochrome P450||Cytochrome P450, conserved site||Cytochrome P450, E-class, group I
ENSDARG00000043168	106.147	52.7103	1.0099	2.6379e-05	0.00092431	CELA1 (2 of 7)	Trypsin-like cysteine/serine peptidase domain||Peptidase S1||Peptidase S1A, chymotrypsin-type
ENSDARG00000043175	110.48	53.5175	1.0457	1.0106e-05	0.00038562	CELA1 (5 of 7)	Peptidase S1, trypsin family, active site||Trypsin-like cysteine/serine peptidase domain||Peptidase S1||Peptidase S1A, chymotrypsin-type
ENSDARG00000043236	96.4895	33.2567	1.5367	2.1344e-08	1.2281e-06	ccna1	Cyclin-like||Cyclin, N-terminal||Cyclin, C-terminal domain
ENSDARG00000043237	41.9716	88.55	-1.0771	2.7535e-05	0.00095869	nfil3-2	Basic-leucine zipper domain
ENSDARG00000043342	238.471	84.0297	1.5048	4.3947e-18	6.1596e-16	gpx3	Glutathione peroxidase||Glutathione peroxidase active site||Thioredoxin-like fold
ENSDARG00000043584	349.492	143.198	1.2873	1.3788e-20	2.1846e-18	ifit15	-
ENSDARG00000043646	40.8884	104.129	-1.3486	6.1996e-08	3.2429e-06	slc6a8	Sodium:neurotransmitter symporter
ENSDARG00000044365	112.466	43.1853	1.3809	2.4823e-08	1.3953e-06	angptl3	Fibrinogen, alpha/beta/gamma chain, C-terminal globular domain
ENSDARG00000045015	66.7032	17.7584	1.9093	5.4265e-08	2.8729e-06	CYP27B1	Cytochrome P450||Cytochrome P450, conserved site||Cytochrome P450, E-class, group I
ENSDARG00000045051	54.3374	16.7898	1.6944	6.3533e-06	0.00024851	slc16a3	Major facilitator superfamily||Major facilitator superfamily domain||Monocarboxylate transporter
ENSDARG00000045299	170.775	80.8816	1.0782	1.7918e-08	1.042e-06	vmo1b	Vitelline membrane outer layer protein I (VOMI)
ENSDARG00000045423	230.889	74.7469	1.6271	1.6066e-19	2.3591e-17	BX571823.1	-
ENSDARG00000045424	365.378	92.4246	1.983	6.032e-39	2.1982e-36	zgc:173856	-
ENSDARG00000045516	903.788	415.225	1.1221	6.769e-41	2.691e-38	itih2	von Willebrand factor, type A||VIT domain||Inter-alpha-trypsin inhibitor heavy chain, C-terminal
ENSDARG00000045982	22.6556	65.3026	-1.5273	2.6147e-06	0.00010767	PLA2G4C (3 of 4)	Acyl transferase/acyl hydrolase/lysophospholipase||Lysophospholipase, catalytic domain
ENSDARG00000046053	47.297	13.9646	1.76	1.5109e-05	0.00055336	slc27a6	AMP-binding enzyme C-terminal domain||AMP-dependent synthetase/ligase||AMP-binding, conserved site
ENSDARG00000051890	2.16628	40.5215	-4.2254	1.9276e-10	1.3596e-08	hp	Peptidase S1||Peptidase S1A, chymotrypsin-type||Trypsin-like cysteine/serine peptidase domain
ENSDARG00000051923	87.2828	42.7817	1.0287	0.00010859	0.0033631	ccnb1	Cyclin, C-terminal domain||Cyclin, N-terminal||Cyclin-like||-
ENSDARG00000052470	175.107	78.0564	1.1657	1.2045e-09	7.769e-08	igfbp2a	Thyroglobulin type-1||Insulin-like growth factor binding protein, N-terminal||Insulin-like growth factor binding protein 2||Insulin-like growth factor binding protein, N-terminal, Cys-rich conserved site||Insulin-like growth factor-binding protein, IGFBP||Insulin-like growth factor-binding protein family 1-6, chordata
ENSDARG00000053215	263.654	126.166	1.0633	4.6326e-12	3.7515e-10	me1	Malic enzyme, conserved site||Malic enzyme, NAD-binding||Malic oxidoreductase||Malic enzyme, N-terminal domain
ENSDARG00000053476	161.297	71.7602	1.1685	5.0227e-09	3.0848e-07	lipca	Lipase, LIPH-type||Lipase, N-terminal||Alpha/Beta hydrolase fold||Lipase/lipooxygenase, PLAT/LH2||Triacylglycerol lipase family||PLAT/LH2 domain||Hepatic lipase
ENSDARG00000053620	59.3018	22.5209	1.3968	4.4288e-05	0.001465	ebi3	Fibronectin type III||Immunoglobulin-like domain||Long hematopoietin receptor, soluble alpha chain, conserved site
ENSDARG00000053774	69.4111	169.27	-1.2861	2.7814e-11	2.119e-09	alpi.2	Alkaline-phosphatase-like, core domain||Alkaline phosphatase
ENSDARG00000053845	52.8932	14.3682	1.8802	1.6596e-06	7.046e-05	cbln14	Tumour necrosis factor-like domain||Complement C1q protein
ENSDARG00000054978	135.844	359.366	-1.4035	3.7152e-25	7.1257e-23	kifc3	-||P-loop containing nucleoside triphosphate hydrolase||Kinesin motor domain||Kinesin motor domain, conserved site
ENSDARG00000055036	267.535	113.412	1.2382	3.0162e-15	3.2648e-13	itih3a	Inter-alpha-trypsin inhibitor heavy chain, C-terminal||VIT domain||von Willebrand factor, type A
ENSDARG00000055192	14.7126	132.623	-3.1722	2.6337e-25	5.1417e-23	zgc:136930	Intermediate filament protein||Intermediate filament protein, conserved site
ENSDARG00000055388	211.302	95.9763	1.1386	5.6955e-11	4.2072e-09	vtna	Hemopexin-like domain||Somatomedin B, chordata||Somatomedin B domain||Hemopexin-like repeats
ENSDARG00000055415	65.0785	25.104	1.3743	2.3928e-05	0.00084383	zp2l1	Zona pellucida domain||P-type trefoil
ENSDARG00000055416	283.782	585.948	-1.046	5.7581e-26	1.1551e-23	serpinb1	Serpin domain||Serpin, conserved site
ENSDARG00000055705	234.951	108.407	1.1159	1.0806e-11	8.3787e-10	f5	Coagulation factor 5/8 C-terminal type domain||Cupredoxin||Multicopper oxidase, copper-binding site||Galactose-binding domain-like||Multicopper oxidase, type 3
ENSDARG00000056026	63.8149	158.777	-1.315	5.4502e-11	4.0396e-09	tprg1	Inositol phosphatase||-
ENSDARG00000056248	19.4062	203.092	-3.3875	6.0562e-40	2.2831e-37	-	Intermediate filament protein, conserved site||Intermediate filament protein
ENSDARG00000056314	1248.95	479.639	1.3807	4.5502e-77	4.9745e-74	a2ml	Alpha-2-macroglobulin, conserved site||Terpenoid cyclases/protein prenyltransferase alpha-alpha toroid||Immunoglobulin E-set||Alpha-macroglobulin, receptor-binding||Alpha-2-macroglobulin||Alpha-2-macroglobulin, N-terminal 2||Alpha-2-macroglobulin, thiol-ester bond-forming||Alpha-macroglobulin complement component||Alpha-2-macroglobulin, N-terminal
ENSDARG00000056462	63.0928	25.2654	1.3203	5.5374e-05	0.0017831	crp2	Concanavalin A-like lectin/glucanase domain||Pentaxin, conserved site||Pentaxin||-
ENSDARG00000056481	98.9266	36.9698	1.42	9.1918e-08	4.6415e-06	vat1	GroES (chaperonin 10)-like||Polyketide synthase, enoylreductase domain||Alcohol dehydrogenase GroES-like||Quinone oxidoreductase/zeta-crystallin, conserved site
ENSDARG00000056498	6.3183	36.0012	-2.5104	1.4807e-06	6.3357e-05	crp	Pentaxin||Concanavalin A-like lectin/glucanase domain
ENSDARG00000056778	66.3422	16.9512	1.9685	3.1149e-08	1.7199e-06	-//-
ENSDARG00000057113	115.083	54.5668	1.0766	3.9001e-06	0.00015618	c6	Low-density lipoprotein (LDL) receptor class A, conserved site||Membrane attack complex component/perforin/complement C9||Membrane attack complex component/perforin domain, conserved site||Membrane attack complex component/perforin (MACPF) domain||Sushi/SCR/CCP domain||Low-density lipoprotein (LDL) receptor class A repeat||Thrombospondin, type 1 repeat||Factor I / membrane attack complex
ENSDARG00000057121	1.08314	19.1307	-4.1426	1.3526e-05	0.00050352	C7 (2 of 2)	Membrane attack complex component/perforin/complement C9||Low-density lipoprotein (LDL) receptor class A repeat||Thrombospondin, type 1 repeat||Membrane attack complex component/perforin domain, conserved site||Membrane attack complex component/perforin (MACPF) domain||Sushi/SCR/CCP domain||Factor I / membrane attack complex
ENSDARG00000057173	50.0951	9.52498	2.3949	5.218e-08	2.7827e-06	ifit8	Tetratricopeptide repeat-containing domain
ENSDARG00000057498	304.723	141.502	1.1067	1.5155e-14	1.5484e-12	habp2	Epidermal growth factor-like domain||Peptidase S1A, chymotrypsin-type||EGF-like, conserved site||Kringle-like fold||Kringle, conserved site||Trypsin-like cysteine/serine peptidase domain||Peptidase S1||Peptidase S1, trypsin family, active site||Kringle||EGF-like calcium-binding domain
ENSDARG00000057826	71.8481	148.767	-1.05	1.0062e-07	5.0345e-06	si:ch73-61d6.3	Occludin||Occludin/RNA polymerase II elongation factor, ELL domain||Marvel domain
ENSDARG00000058053	192.708	70.953	1.4415	4.6206e-14	4.5305e-12	serping1	Immunoglobulin-like domain||Serpin domain||Immunoglobulin subtype||Immunoglobulin V-set domain
ENSDARG00000058206	8.39432	40.1179	-2.2568	1.7762e-06	7.5266e-05	si:ch211-153b23.5	ThiJ/PfpI||Class I glutamine amidotransferase-like
ENSDARG00000058371	222.585	562.377	-1.3372	7.3842e-36	2.274e-33	krt5	Intermediate filament protein, conserved site||Keratin, type II||Prefoldin||-||Intermediate filament protein
ENSDARG00000058440	17.2399	55.374	-1.6835	3.535e-06	0.00014313	-//-
ENSDARG00000058508	1.89549	20.2608	-3.418	2.7516e-05	0.00095869	CFAP70	Tetratricopeptide repeat-containing domain||Tetratricopeptide repeat
ENSDARG00000058603	36.2851	82.0117	-1.1765	1.5183e-05	0.00055513	jph1a	Junctophilin||MORN motif
ENSDARG00000058999	115.805	272.269	-1.2333	2.9115e-16	3.3683e-14	cdx1b	Caudal-like activation domain||Homeodomain, metazoa||Homeobox, conserved site||Homeobox domain||Helix-turn-helix motif||Homeodomain-like
ENSDARG00000059252	83.2211	29.705	1.4862	3.9236e-07	1.8585e-05	zpcx	-||Zona pellucida domain
ENSDARG00000060879	53.4348	111.797	-1.065	3.0225e-06	0.00012353	slc28a1	Nucleoside recognition Gate||Concentrative nucleoside transporter N-terminal domain||Concentrative nucleoside transporter, metazoan/bacterial||Concentrative nucleoside transporter C-terminal domain
ENSDARG00000061177	147.487	58.0378	1.3455	3.9408e-10	2.676e-08	mov10b.1	AAA+ ATPase domain||P-loop containing nucleoside triphosphate hydrolase
ENSDARG00000061211	40.6177	121.322	-1.5787	5.409e-11	4.0227e-09	-//-
ENSDARG00000061764	271.416	121.645	1.1578	5.1558e-14	4.9882e-12	ahnak	Prismane-like||PDZ domain
ENSDARG00000061896	194.062	71.8409	1.4336	4.802e-14	4.6873e-12	slco2a1	Organic anion transporter polypeptide OATP||Major facilitator superfamily domain||Kazal domain
ENSDARG00000062688	27.62	6.21545	2.1518	0.00015388	0.004609	gpnmb	PKD domain||-
ENSDARG00000063518	76.2709	32.3688	1.2365	2.5743e-05	0.00090348	CPN2	Leucine-rich repeat||Leucine-rich repeat, typical subtype||Cysteine-rich flanking region, C-terminal
ENSDARG00000067630	33.3065	82.7382	-1.3127	2.2703e-06	9.4193e-05	zgc:154075	Oxidoreductase, C-terminal||Oxidoreductase, N-terminal
ENSDARG00000067990	124.922	315.535	-1.3368	7.9086e-21	1.2809e-18	myhz1.1	IQ motif, EF-hand binding site||Myosin head, motor domain||Myosin tail||Myosin, N-terminal, SH3-like||P-loop containing nucleoside triphosphate hydrolase
ENSDARG00000067995	44.7697	90.4873	-1.0152	5.2936e-05	0.0017147	myhz1.2	Myosin tail||Myosin head, motor domain||IQ motif, EF-hand binding site||P-loop containing nucleoside triphosphate hydrolase||Myosin, N-terminal, SH3-like
ENSDARG00000068181	78.5275	166.203	-1.0817	8.2118e-09	4.9599e-07	dpep1	Membrane dipeptidase, active site||Renal dipeptidase family
ENSDARG00000068290	35.0215	89.1151	-1.3474	5.609e-07	2.6094e-05	wu:fd49b10	Cytochrome P450||Cytochrome P450, conserved site||Cytochrome P450, E-class, group I
ENSDARG00000068465	82.5892	30.5929	1.4328	8.9001e-07	3.9553e-05	zgc:136254	Beta-propeller repeat TECPR
ENSDARG00000068710	414.571	187.029	1.1484	2.4194e-20	3.6994e-18	nid1a	EGF domain, merozoite surface protein 1-like||Thyroglobulin type-1||EGF-type aspartate/asparagine hydroxylation site||LDLR class B repeat||G2 nidogen/fibulin G2F||EGF-like calcium-binding domain||Green fluorescent protein||Nidogen, extracellular domain||EGF-like, conserved site||EGF-like calcium-binding, conserved site||Epidermal growth factor-like domain||Complement Clr-like EGF domain
ENSDARG00000068874	15.525	103.08	-2.7311	1.5401e-17	2.0045e-15	PTCHD3 (2 of 3)	Patched||Sterol-sensing domain
ENSDARG00000068944	72.6605	163.297	-1.1683	1.2691e-09	8.1374e-08	-//-
ENSDARG00000069017	32.6747	5.81185	2.4911	6.8332e-06	0.0002668	elnb	-
ENSDARG00000069251	405.274	115.833	1.8068	4.3099e-38	1.4498e-35	si:dkeyp-50f7.2	Zona pellucida domain
ENSDARG00000069375	123.387	59.0064	1.0643	2.1938e-06	9.154e-05	zgc:162608	-
ENSDARG00000069994	69.2305	7.18409	3.2685	5.3677e-14	5.1703e-12	-//-
ENSDARG00000070062	9.92876	34.7097	-1.8057	0.000117	0.0036071	-//-
ENSDARG00000070078	208.414	71.3566	1.5463	1.341e-16	1.5936e-14	abcb11b	P-loop containing nucleoside triphosphate hydrolase||AAA+ ATPase domain||ABC transporter-like||ABC transporter, conserved site||ABC transporter type 1, transmembrane domain
ENSDARG00000070132	190.993	69.4193	1.4601	3.3932e-14	3.3572e-12	aste1	PIN domain-like
ENSDARG00000070709	196.319	62.881	1.6425	4.8406e-17	5.9128e-15	wu:fi42e03	-
ENSDARG00000070835	85.0263	170.965	-1.0077	3.3242e-08	1.8035e-06	tnnc2	EF-hand domain pair||EF-Hand 1, calcium-binding site||EF-hand domain
ENSDARG00000070960	250.476	112.282	1.1575	4.8227e-13	4.2474e-11	si:ch211-288g17.4	-
ENSDARG00000070964	69.4111	29.4629	1.2363	5.975e-05	0.0019128	si:rp71-15k1.1	-
ENSDARG00000071012	101.634	44.5575	1.1896	2.4904e-06	0.00010313	ifit14	-
ENSDARG00000071429	274.936	124.228	1.1461	5.7403e-14	5.4809e-12	tdo2a	-||Tryptophan 2,3-dioxygenase
ENSDARG00000071462	71.3968	183.477	-1.3617	4.5664e-13	4.0423e-11	lama3	Laminin G domain||EGF-like, laminin||EGF-like, conserved site||Laminin alpha, domain I||Concanavalin A-like lectin/glucanase domain||Laminin domain II
ENSDARG00000071727	101.003	34.1446	1.5647	6.3417e-09	3.8625e-07	si:dkey-37o8.1	Translation elongation factor EF1A/initiation factor IF2gamma, C-terminal||Translation elongation factor EFTu/EF1A, domain 2||Translation protein, beta-barrel domain||Elongation factor, GTP-binding domain||Translation elongation factor EF1A, eukaryotic/archaeal||P-loop containing nucleoside triphosphate hydrolase||Translation elongation factor EFTu/EF1A, C-terminal
ENSDARG00000073704	28.3421	65.9484	-1.2184	6.71e-05	0.0021387	si:dkeyp-72g9.4	-
ENSDARG00000073756	34.6604	95.8148	-1.467	3.2518e-08	1.7775e-06	slc12a7a	K/Cl co-transporter||-||Amino acid permease/ SLC12A domain||Na/K/Cl co-transporter superfamily
ENSDARG00000073836	19.7673	78.7829	-1.9948	5.68e-10	3.798e-08	CR788316.1	-
ENSDARG00000074028	239.734	107.358	1.159	1.4338e-12	1.2246e-10	-//-
ENSDARG00000074191	70.6747	27.3641	1.3689	1.1373e-05	0.00043249	zgc:172253	-
ENSDARG00000074217	27.5297	4.52033	2.6065	2.2692e-05	0.00080415	si:dkey-188i13.6	Interferon alpha-inducible protein 6/27
ENSDARG00000074289	74.1949	30.0279	1.305	1.4764e-05	0.00054362	tuba4l	Tubulin, conserved site||Tubulin||Tubulin/FtsZ, C-terminal||Tubulin/FtsZ, 2-layer sandwich domain||Tubulin/FtsZ, GTPase domain||Alpha tubulin
ENSDARG00000074570	97.9337	34.7097	1.4965	3.1781e-08	1.7459e-06	-//-
ENSDARG00000074612	85.5679	28.8171	1.5701	8.3591e-08	4.2604e-06	-//-
ENSDARG00000074635	182.148	78.46	1.2151	1.4298e-10	1.0216e-08	abca1a	ABC transporter, conserved site||AAA+ ATPase domain||P-loop containing nucleoside triphosphate hydrolase||ABC transporter-like
ENSDARG00000074656	108.314	44.1539	1.2946	1.9781e-07	9.5899e-06	ctssb.1	Proteinase inhibitor I29, cathepsin propeptide||Cysteine peptidase, asparagine active site||Cysteine peptidase, histidine active site||Cysteine peptidase, cysteine active site||Peptidase C1A, papain C-terminal
ENSDARG00000074752	38.9027	83.2225	-1.0971	3.7105e-05	0.001252	hlfa	Basic-leucine zipper domain
ENSDARG00000074754	85.2068	12.2695	2.7959	9.8869e-15	1.0245e-12	si:dkey-188i13.9	Interferon alpha-inducible protein 6/27
ENSDARG00000074764	133.226	39.7143	1.7461	5.1202e-13	4.4781e-11	A2ML1 (5 of 13)	Alpha-macroglobulin, receptor-binding||Immunoglobulin E-set||Terpenoid cyclases/protein prenyltransferase alpha-alpha toroid||Alpha-macroglobulin complement component||Alpha-2-macroglobulin, conserved site||Alpha-2-macroglobulin, thiol-ester bond-forming
ENSDARG00000074881	7.4917	97.0256	-3.695	3.3584e-21	5.5631e-19	-//-
ENSDARG00000074908	247.768	96.2184	1.3646	2.4306e-16	2.842e-14	col6a1	von Willebrand factor, type A||Collagen triple helix repeat
ENSDARG00000075016	354.276	148.848	1.251	5.4178e-20	8.0586e-18	apobb.2	Lipid transport protein, N-terminal||Vitellinogen, open beta-sheet||Lipid transport, open beta-sheet||Lipid transport protein, beta-sheet shell
ENSDARG00000075090	222.585	81.4466	1.4504	3.8178e-16	4.3477e-14	CU467646.1	-
ENSDARG00000075159	493.369	184.123	1.422	6.9691e-33	1.8359e-30	mfi2	Transferrin||Transferrin family, iron binding site||Transferrin-like domain
ENSDARG00000075614	74.4657	33.2567	1.1629	7.5905e-05	0.0024123	zgc:193682	-
ENSDARG00000075626	0	16.2248	-5.0201	3.0742e-05	0.0010585	zgc:172090	P-loop containing nucleoside triphosphate hydrolase||AIG1-type guanine nucleotide-binding (G) domain
ENSDARG00000075668	53.5251	5.97329	3.1636	7.1038e-11	5.1948e-09	-//-
ENSDARG00000075737	261.036	67.6435	1.9482	1.1094e-27	2.3782e-25	A2ML1 (6 of 13)	Alpha-macroglobulin complement component||Alpha-2-macroglobulin, N-terminal||Alpha-2-macroglobulin||Alpha-2-macroglobulin, N-terminal 2||Alpha-2-macroglobulin, thiol-ester bond-forming||Terpenoid cyclases/protein prenyltransferase alpha-alpha toroid||Alpha-macroglobulin, receptor-binding||Immunoglobulin E-set||Alpha-2-macroglobulin, conserved site
ENSDARG00000075757	133.136	34.4675	1.9496	6.6877e-15	6.9965e-13	gig2e	Poly(ADP-ribose) polymerase, catalytic domain
ENSDARG00000075761	449.141	187.755	1.2583	3.9042e-25	7.4231e-23	-//-
ENSDARG00000075864	53.4348	122.13	-1.1926	9.5313e-08	4.8019e-06	igsf9a	Immunoglobulin subtype 2||Fibronectin type III||Immunoglobulin-like domain||Immunoglobulin V-set domain||Immunoglobulin subtype
ENSDARG00000075990	38.0903	148.929	-1.9671	2.9985e-17	3.7464e-15	acap3a	Pleckstrin homology domain||Ankyrin repeat-containing domain||Arf GTPase activating protein||Ankyrin repeat
ENSDARG00000076122	41.3398	156.436	-1.92	1.5864e-17	2.0404e-15	si:ch211-160b11.4	C-type lectin fold||C-type lectin
ENSDARG00000076126	0	13.9646	-4.8037	0.00012201	0.0037259	si:ch73-187m15.4	Actin, conserved site||Actin family||Actin/actin-like conserved site
ENSDARG00000076182	73.5631	16.9512	2.1176	9.7267e-10	6.3485e-08	stat1b	STAT transcription factor, all-alpha domain||STAT transcription factor, coiled coil||SH2 domain||STAT transcription factor, DNA-binding||STAT transcription factor, protein interaction||p53-like transcription factor, DNA-binding
ENSDARG00000076270	74.2852	28.8978	1.3621	7.3732e-06	0.00028635	adamts13	Peptidase M12B, ADAM-TS||Thrombospondin, type 1 repeat||Peptidase M12B, ADAM/reprolysin||CUB domain
ENSDARG00000076366	294.613	79.4286	1.8911	7.2059e-30	1.6942e-27	A2ML1 (7 of 13)	Alpha-2-macroglobulin, conserved site||Alpha-macroglobulin, receptor-binding||Immunoglobulin E-set||Terpenoid cyclases/protein prenyltransferase alpha-alpha toroid||Alpha-2-macroglobulin, thiol-ester bond-forming||Alpha-2-macroglobulin, N-terminal 2||Alpha-2-macroglobulin||Alpha-2-macroglobulin, N-terminal||Alpha-macroglobulin complement component
ENSDARG00000076448	262.39	118.659	1.1449	2.2327e-13	2.0341e-11	serpinf2a	Serpin domain
ENSDARG00000076476	170.414	64.334	1.4054	3.502e-12	2.8678e-10	zgc:173770	-
ENSDARG00000076534	102.718	19.3728	2.4066	5.3813e-15	5.7118e-13	si:ch211-14a17.10	-
ENSDARG00000076765	22.3848	61.1859	-1.4507	1.1823e-05	0.00044492	ddhd2	Sterile alpha motif, type 1||DDHD||Sterile alpha motif/pointed domain||WWE domain||Sterile alpha motif domain
ENSDARG00000076771	176.551	47.7863	1.8854	1.7874e-18	2.5543e-16	A2ML1 (8 of 13)	Alpha-macroglobulin complement component||Alpha-2-macroglobulin, N-terminal||Alpha-2-macroglobulin, N-terminal 2||Alpha-2-macroglobulin, thiol-ester bond-forming||Alpha-2-macroglobulin||Terpenoid cyclases/protein prenyltransferase alpha-alpha toroid||Immunoglobulin E-set||Alpha-macroglobulin, receptor-binding||Alpha-2-macroglobulin, conserved site
ENSDARG00000076772	54.7887	142.067	-1.3746	1.4174e-10	1.0161e-08	-//-
ENSDARG00000076949	108.133	36.0012	1.5867	1.268e-09	8.1374e-08	zgc:173837	-
ENSDARG00000077058	80.2424	20.0993	1.9972	7.9424e-10	5.2307e-08	CELA1 (6 of 7)	Trypsin-like cysteine/serine peptidase domain||Peptidase S1A, chymotrypsin-type||Peptidase S1
ENSDARG00000077068	67.7864	139.727	-1.0435	2.812e-07	1.3454e-05	NLRX1 (2 of 3)	Leucine-rich repeat, cysteine-containing subtype||Leucine-rich repeat, ribonuclease inhibitor subtype||NACHT nucleoside triphosphatase||Leucine-rich repeat||NACHT-associated domain
ENSDARG00000077139	189.188	92.4246	1.0335	1.0603e-08	6.3171e-07	col6a3	von Willebrand factor, type A||Proteinase inhibitor I2, Kunitz, conserved site||Collagen triple helix repeat||Proteinase inhibitor I2, Kunitz metazoa
ENSDARG00000077171	358.519	88.6307	2.0162	4.6612e-39	1.7274e-36	A2ML1 (9 of 13)	Alpha-macroglobulin, receptor-binding||Immunoglobulin E-set||Terpenoid cyclases/protein prenyltransferase alpha-alpha toroid||Alpha-2-macroglobulin, conserved site||Alpha-2-macroglobulin, N-terminal||Alpha-macroglobulin complement component||Alpha-2-macroglobulin, thiol-ester bond-forming||Alpha-2-macroglobulin, N-terminal 2||Alpha-2-macroglobulin
ENSDARG00000077505	2268.18	1113.78	1.0261	2.0102e-86	2.5855e-83	-//-
ENSDARG00000077855	36.2851	86.0477	-1.2458	3.6175e-06	0.00014594	znrf2a	-||Zinc finger, RING-type
ENSDARG00000077960	100.822	43.831	1.2018	2.2595e-06	9.3922e-05	si:ch211-186e20.7	Serpin domain||Serpin, conserved site
ENSDARG00000077982	51.449	260.807	-2.3418	1.3681e-35	4.0979e-33	elf3	Sterile alpha motif/pointed domain||Pointed domain||Ets domain
ENSDARG00000078183	83.1308	19.7764	2.0716	1.4768e-10	1.0518e-08	A2ML1 (10 of 13)	Alpha-macroglobulin, receptor-binding||Immunoglobulin E-set||Terpenoid cyclases/protein prenyltransferase alpha-alpha toroid||Alpha-2-macroglobulin, conserved site||Alpha-2-macroglobulin, N-terminal||Alpha-macroglobulin complement component||Alpha-2-macroglobulin||Alpha-2-macroglobulin, N-terminal 2||Alpha-2-macroglobulin, thiol-ester bond-forming
ENSDARG00000078297	30.9597	74.7469	-1.2716	1.1548e-05	0.00043761	ptprh	Protein-tyrosine/Dual specificity phosphatase||Protein-tyrosine phosphatase, receptor/non-receptor type||Fibronectin type III||Protein-tyrosine phosphatase-like||Protein-tyrosine phosphatase, catalytic
ENSDARG00000078389	107.862	24.0546	2.1648	5.9998e-14	5.7037e-12	si:dkey-188i13.7	Interferon alpha-inducible protein 6/27
ENSDARG00000078394	75.2781	27.5256	1.4515	2.152e-06	9.0139e-05	CABZ01059627.1	-
ENSDARG00000078541	59.031	159.987	-1.4384	1.9231e-12	1.6201e-10	CERS3 (2 of 2)	Ceramide synthase component Lag1/Lac1||Homeobox domain||Homeodomain-like||TRAM/LAG1/CLN8 homology domain
ENSDARG00000078638	210.58	68.0471	1.6298	5.5798e-18	7.7216e-16	zgc:171750	-
ENSDARG00000078731	82.7698	6.94193	3.5757	1.3876e-17	1.8277e-15	BX005336.3	Very large inducible GTPASE (VLIG)-type guanine nucleotide-binding (G) domain||RHD3/Sey1||Fibronectin type III||P-loop containing nucleoside triphosphate hydrolase
ENSDARG00000078757	1435.7	607.661	1.2404	6.6711e-75	6.9459e-72	A2ML1 (11 of 13)	Alpha-macroglobulin complement component||Alpha-2-macroglobulin||Alpha-2-macroglobulin, N-terminal 2||Alpha-2-macroglobulin, thiol-ester bond-forming||Alpha-macroglobulin, receptor-binding||Immunoglobulin E-set||Terpenoid cyclases/protein prenyltransferase alpha-alpha toroid||Alpha-2-macroglobulin, conserved site
ENSDARG00000079034	333.245	103.322	1.6894	6.6183e-29	1.5074e-26	si:dkey-19b23.11	Zona pellucida domain||-
ENSDARG00000079043	82.2282	23.1667	1.8276	4.6857e-09	2.8942e-07	si:dkeyp-75b4.10	C-type lectin, conserved site||C-type lectin fold||C-type lectin
ENSDARG00000079420	68.0571	181.54	-1.4155	1.2582e-13	1.1807e-11	dpp4	Peptidase S9, prolyl oligopeptidase, catalytic domain||Alpha/Beta hydrolase fold||Peptidase S9B, dipeptidylpeptidase IV N-terminal||Peptidase S9, serine active site
ENSDARG00000079543	192.528	85.5634	1.17	1.6131e-10	1.1451e-08	dpys	Amidohydrolase 1||Hydantoinase/dihydropyrimidinase||Metal-dependent hydrolase, composite domain
ENSDARG00000079546	216.718	73.2939	1.5641	1.8208e-17	2.3146e-15	BX548000.1	-
ENSDARG00000079589	304.723	151.512	1.0081	1.1587e-12	9.9744e-11	si:dkeyp-73d8.6	-
ENSDARG00000079647	479.288	1005.45	-1.0689	7.9903e-45	3.4256e-42	muc13b	SEA domain||Epidermal growth factor-like domain||Insulin-like growth factor binding protein, N-terminal
ENSDARG00000079681	146.765	43.0238	1.7703	1.947e-14	1.9579e-12	CABZ01059627.2	-
ENSDARG00000079727	185.578	91.0523	1.0273	1.7275e-08	1.0072e-06	sepp1b	Selenoprotein P, N-terminal
ENSDARG00000079752	54.4277	16.7091	1.7037	5.7366e-06	0.00022682	col6a6	Proteinase inhibitor I2, Kunitz metazoa||Collagen triple helix repeat||Proteinase inhibitor I2, Kunitz, conserved site||von Willebrand factor, type A
ENSDARG00000086221	55.6011	17.8392	1.6401	8.185e-06	0.00031675	si:ch211-226h8.4	D-galactoside/L-rhamnose binding SUEL lectin domain
ENSDARG00000086247	52.4419	20.0993	1.3836	0.0001377	0.0041527	zgc:171781	D-galactoside/L-rhamnose binding SUEL lectin domain
ENSDARG00000086352	68.0571	19.05	1.837	8.8811e-08	4.495e-06	zp2.1	Zona pellucida domain||P-type trefoil||Zona pellucida domain, conserved site
ENSDARG00000086370	4263.86	8596.62	-1.0116	0	0	-//-
ENSDARG00000086374	140.537	47.9478	1.5514	9.9363e-12	7.7316e-10	isg15	Ubiquitin-related domain||Ubiquitin||Ubiquitin-like
ENSDARG00000086481	94.0525	41.5709	1.1779	7.0051e-06	0.00027302	mogat3a	Diacylglycerol acyltransferase
ENSDARG00000086483	0	34.7904	-5.2684	8.5551e-10	5.6173e-08	-//-
ENSDARG00000086522	87.7341	25.4269	1.7868	2.5781e-09	1.6292e-07	zp2.5	Zona pellucida domain, conserved site||P-type trefoil||Zona pellucida domain
ENSDARG00000086641	54.4277	18.4042	1.5643	2.0226e-05	0.00072736	-//-
ENSDARG00000087012	0	25.3461	-5.6637	1.482e-07	7.3148e-06	BX004816.4	P-loop containing nucleoside triphosphate hydrolase||AIG1-type guanine nucleotide-binding (G) domain
ENSDARG00000087099	18.5036	62.881	-1.7648	3.3066e-07	1.5752e-05	si:ch73-106k19.5	-
ENSDARG00000087143	144.057	54.7283	1.3963	1.9726e-10	1.3868e-08	serpina7	Serpin, conserved site||Serpin domain
ENSDARG00000087188	69.2305	19.5343	1.8254	7.8468e-08	4.018e-06	nfil3-6	Basic-leucine zipper domain
ENSDARG00000087194	93.9622	46.0105	1.0301	5.8062e-05	0.0018615	-//-
ENSDARG00000087209	103.44	44.4768	1.2177	1.2942e-06	5.6035e-05	-//-
ENSDARG00000087363	69.1403	23.0052	1.5876	1.1933e-06	5.1974e-05	si:dkeyp-46h3.6	D-galactoside/L-rhamnose binding SUEL lectin domain
ENSDARG00000087392	139.634	38.7457	1.8495	1.3917e-14	1.4287e-12	si:ch73-160p18.3	-
ENSDARG00000087508	71.4871	191.549	-1.422	2.2071e-14	2.2036e-12	CD99L2 (3 of 3)	CD99 antigen-like protein 2
ENSDARG00000087575	21.3017	3.14809	2.7584	0.00012156	0.0037174	-	Very large inducible GTPASE (VLIG)-type guanine nucleotide-binding (G) domain||P-loop containing nucleoside triphosphate hydrolase
ENSDARG00000087697	75.9099	34.7904	1.1256	0.00010028	0.0031233	lpl	PLAT/LH2 domain||Triacylglycerol lipase family||Alpha/Beta hydrolase fold||Lipoprotein lipase||Lipase/lipooxygenase, PLAT/LH2||Lipase, N-terminal||Lipase, LIPH-type
ENSDARG00000088251	139.905	22.6016	2.63	8.1214e-22	1.366e-19	si:ch211-24o10.6	-||Immunoglobulin V-set domain
ENSDARG00000088366	50.7269	103.241	-1.0252	1.3491e-05	0.00050336	zgc:77938	Polyketide synthase, enoylreductase domain||GroES (chaperonin 10)-like||Alcohol dehydrogenase, zinc-type, conserved site||Alcohol dehydrogenase, C-terminal||Alcohol dehydrogenase GroES-like
ENSDARG00000088651	14.8931	53.1946	-1.8366	1.4064e-06	6.0415e-05	-//-
ENSDARG00000088923	50.9075	16.4669	1.6283	2.1804e-05	0.00077646	si:dkeyp-98a7.10	D-galactoside/L-rhamnose binding SUEL lectin domain
ENSDARG00000088989	134.309	60.9437	1.14	1.7081e-07	8.2996e-06	si:dkey-241l7.5	C-type lectin||Type-2 ice-structuring protein||C-type lectin, conserved site||C-type lectin fold
ENSDARG00000089075	32.9454	95.0884	-1.5292	1.3833e-08	8.1525e-07	si:ch73-173p19.1	Ubiquitin-associated/translation elongation factor EF1B, N-terminal, eukaryote||Leucine-rich repeat, cysteine-containing subtype||UBX domain||UBA-like||Ubiquitin-related domain||Leucine rich repeat 4
ENSDARG00000089304	3.88124	23.9739	-2.6269	5.6483e-05	0.001814	si:dkeyp-4f2.1	NACHT nucleoside triphosphatase||SPRY domain||Leucine-rich repeat, ribonuclease inhibitor subtype||NACHT-associated domain||Concanavalin A-like lectin/glucanase domain||SPRY-associated
ENSDARG00000089310	457.265	179.602	1.3482	2.6077e-28	5.7594e-26	gc	Serum albumin-like||Serum albumin, N-terminal||ALB/AFP/VDB||Vitamin D-binding protein
ENSDARG00000089352	207.511	71.1952	1.5433	1.7214e-16	2.0236e-14	-//-
ENSDARG00000089369	47.9288	120.192	-1.3264	9.2989e-09	5.5857e-07	fdxr	Ferredoxin-NADP+ reductase, adrenodoxin-type||-
ENSDARG00000089399	205.074	481.334	-1.2309	1.8613e-27	3.9511e-25	tmem176l.2	CD20-like family
ENSDARG00000089567	68.5085	18.4042	1.8962	4.1519e-08	2.225e-06	PATL2	Topoisomerase II-associated protein PAT1
ENSDARG00000089966	126.998	30.2701	2.0688	2.509e-15	2.7293e-13	si:zfos-1505d6.3	P-type trefoil||Zona pellucida domain||Zona pellucida domain, conserved site
ENSDARG00000090127	31.5915	6.94193	2.1861	4.3425e-05	0.0014408	-//-
ENSDARG00000090228	175.92	358.882	-1.0286	4.0716e-16	4.6128e-14	gstal	Glutathione S-transferase, C-terminal-like||Glutathione S-transferase, N-terminal||Glutathione S-transferase, alpha class||Thioredoxin-like fold||Glutathione S-transferase, C-terminal
ENSDARG00000090237	122.124	49.8043	1.294	3.3703e-08	1.824e-06	zp2.3	P-type trefoil||Zona pellucida domain||Zona pellucida domain, conserved site
ENSDARG00000090268	25.3635	137.547	-2.4391	2.0862e-20	3.235e-18	krtt1c19e	Keratin, type I||Intermediate filament protein
ENSDARG00000090369	13.9003	80.6394	-2.5364	4.2975e-13	3.8353e-11	zgc:86896	WD40 repeat||Actin-related protein 2/3 complex subunit 1||WD40-repeat-containing domain
ENSDARG00000090557	13.0879	41.9745	-1.6813	5.4949e-05	0.0017721	MFAP4 (6 of 14)	Fibrinogen, alpha/beta/gamma chain, C-terminal globular domain
ENSDARG00000090766	15.7958	43.9925	-1.4777	0.00016632	0.0049546	-//-
ENSDARG00000090768	496.528	160.149	1.6325	2.8085e-40	1.0966e-37	zp3.2	Zona pellucida domain
ENSDARG00000090822	44.9502	15.1754	1.5666	0.00010543	0.0032746	QDPR (4 of 4)	-
ENSDARG00000090870	225.744	64.0111	1.8183	3.9583e-22	6.7616e-20	si:ch1073-263o8.2	-
ENSDARG00000090969	13.9003	59.0064	-2.0858	3.3979e-08	1.8344e-06	cbln18	Tumour necrosis factor-like domain||Complement C1q protein
ENSDARG00000090996	44.0476	91.8595	-1.0604	2.4687e-05	0.00086782	PARM1	-
ENSDARG00000091138	56.5037	120.919	-1.0976	6.5614e-07	3.0031e-05	ACTR3 (1 of 2)	Actin/actin-like conserved site||Actin family
ENSDARG00000091215	34.7507	76.2806	-1.1343	5.0265e-05	0.0016404	rpz2	-
ENSDARG00000091409	143.967	36.4048	1.9835	2.5052e-16	2.9137e-14	zp2.6	Zona pellucida domain, conserved site||Zona pellucida domain||P-type trefoil
ENSDARG00000091558	105.155	36.8084	1.5144	7.3294e-09	4.4392e-07	si:ch211-251f6.7	Beta-propeller repeat TECPR
ENSDARG00000091560	77.1736	167.898	-1.1214	2.5009e-09	1.585e-07	SLC6A19 (3 of 3)	Sodium:neurotransmitter symporter
ENSDARG00000091737	135.573	30.8351	2.1364	6.9939e-17	8.4487e-15	-//-
ENSDARG00000091800	95.4064	26.5569	1.845	2.1321e-10	1.4942e-08	-//-
ENSDARG00000091826	5.867	28.8978	-2.3003	4.1119e-05	0.0013726	-//-
ENSDARG00000092044	157.235	62.6388	1.3278	1.6252e-10	1.15e-08	si:dkey-22f5.9	Liver-expressed antimicrobial peptide 2
ENSDARG00000092091	60.9265	206.079	-1.7581	3.0284e-20	4.5984e-18	wu:fd49b10	Cytochrome P450, E-class, group I||Cytochrome P450
ENSDARG00000092404	99.1974	24.5389	2.0152	6.2301e-12	4.9716e-10	lct	Glycoside hydrolase, family 1, active site||Glycoside hydrolase, family 1||Glycoside hydrolase superfamily
ENSDARG00000092498	67.3351	23.3281	1.5293	3.1353e-06	0.0001279	si:dkeyp-46h3.2	D-galactoside/L-rhamnose binding SUEL lectin domain
ENSDARG00000092885	230.257	81.043	1.5065	1.5352e-17	2.0045e-15	zgc:171977	-
ENSDARG00000092887	56.4134	20.0993	1.4889	2.8891e-05	0.0010011	si:dkeyp-46h3.3	D-galactoside/L-rhamnose binding SUEL lectin domain||-
ENSDARG00000092924	310.68	75.7155	2.0368	1.6456e-34	4.6728e-32	zgc:171474	-
ENSDARG00000093068	702.325	251.201	1.4833	5.0267e-49	2.556e-46	c3b.1	Netrin module, non-TIMP type||Netrin domain||Tissue inhibitor of metalloproteinases-like, OB-fold||Terpenoid cyclases/protein prenyltransferase alpha-alpha toroid||Alpha-macroglobulin, receptor-binding||Alpha-macroglobulin complement component||Alpha-2-macroglobulin, N-terminal||Alpha-2-macroglobulin||Anaphylatoxin, complement system||Alpha-2-macroglobulin, thiol-ester bond-forming||Alpha-2-macro…
ENSDARG00000093198	155.159	24.5389	2.6606	2.6276e-24	4.7877e-22	C3 (6 of 6)	Alpha-macroglobulin complement component||Alpha-2-macroglobulin, N-terminal||Anaphylatoxin, complement system||Alpha-2-macroglobulin||Alpha-2-macroglobulin, thiol-ester bond-forming||Alpha-2-macroglobulin, N-terminal 2||Anaphylatoxin/fibulin||Netrin module, non-TIMP type||Terpenoid cyclases/protein prenyltransferase alpha-alpha toroid||Tissue inhibitor of metalloproteinases-like, OB-fold||Netrin …
ENSDARG00000093216	381.896	93.0703	2.0368	4.9952e-42	2.0226e-39	si:ch211-146l10.7	-
ENSDARG00000093255	36.0143	6.53833	2.4616	2.723e-06	0.00011191	si:dkey-229d11.3	-
ENSDARG00000093353	118.062	35.6783	1.7264	1.5406e-11	1.1819e-09	si:ch211-263m18.4	-
ENSDARG00000093569	103.53	50.4501	1.0371	2.1922e-05	0.00077939	bckdhbl	-||Immunoglobulin-like domain
ENSDARG00000093796	6.76961	43.0238	-2.668	5.3363e-08	2.8389e-06	itln2	Fibrinogen, alpha/beta/gamma chain, C-terminal globular domain
ENSDARG00000093857	48.0191	97.0256	-1.0148	2.8601e-05	0.00099265	si:dkey-79f11.10	P-loop containing nucleoside triphosphate hydrolase||Mitochondrial Rho-like
ENSDARG00000094055	54.3374	17.3548	1.6466	9.7753e-06	0.00037498	si:dkey-88l16.3	Insulin-like growth factor binding protein, N-terminal||EGF-like calcium-binding, conserved site||EGF-like, conserved site||Epidermal growth factor-like domain||Low-density lipoprotein (LDL) receptor class A repeat||EGF-like calcium-binding domain||LDLR class B repeat||EGF-type aspartate/asparagine hydroxylation site||Low-density lipoprotein (LDL) receptor class A, conserved site
ENSDARG00000094392	116.618	33.4989	1.7996	5.1364e-12	4.1289e-10	si:dkey-229d11.5	-
ENSDARG00000095209	32.5844	73.6975	-1.1774	4.0687e-05	0.0013624	-//-
ENSDARG00000095233	4.96438	25.7497	-2.3749	7.9966e-05	0.0025267	-//-
ENSDARG00000095281	416.918	124.067	1.7486	1.8679e-37	6.0957e-35	zgc:152652	-
ENSDARG00000095462	133.497	58.1185	1.1997	5.5158e-08	2.9131e-06	CELA1 (7 of 7)	Peptidase S1||Peptidase S1A, chymotrypsin-type||Trypsin-like cysteine/serine peptidase domain||Peptidase S1, trypsin family, active site
ENSDARG00000095463	49.012	15.0947	1.6991	1.7396e-05	0.00063077	si:ch73-90k17.1	-
ENSDARG00000095590	57.6771	18.0813	1.6735	4.033e-06	0.00016121	spp2	Secreted phosphoprotein 24
ENSDARG00000095915	34.2994	4.68177	2.8731	6.3409e-07	2.9165e-05	col6a3	von Willebrand factor, type A
ENSDARG00000095930	26.9882	76.1191	-1.4959	5.809e-07	2.691e-05	myha	Myosin tail||Myosin head, motor domain||IQ motif, EF-hand binding site||P-loop containing nucleoside triphosphate hydrolase||Myosin, N-terminal, SH3-like
ENSDARG00000096095	75.3683	25.7497	1.5494	6.3492e-07	2.9165e-05	buc	-
ENSDARG00000096110	5.32543	49.9658	-3.23	1.2702e-10	9.1659e-09	TSG101 (3 of 3)	Ubiquitin-conjugating enzyme/RWD-like||Ubiquitin E2 variant, N-terminal
ENSDARG00000096311	39.5345	10.0093	1.9818	1.7724e-05	0.00064161	si:dkey-211g8.8	-
ENSDARG00000096562	394.533	118.901	1.7304	4.9059e-35	1.4496e-32	wu:fj29h11	Domain of unknown function DUF3883||Histidine kinase-like ATPase, C-terminal domain||OST-HTH/LOTUS domain
ENSDARG00000096762	63.8149	350.648	-2.4581	7.234e-50	3.766e-47	si:dkey-61p9.11	Beta-ketoacyl synthase, C-terminal||Polyketide synthase, acyl transferase domain||Beta-ketoacyl synthase, active site||Acyl carrier protein-like||Malonyl-CoA ACP transacylase, ACP-binding||Acyl transferase/acyl hydrolase/lysophospholipase||Polyketide synthase, dehydratase domain||Acyl transferase||GroES (chaperonin 10)-like||Polyketide synthase, ketoreductase domain||Thiolase-like||Polyketide syn…
ENSDARG00000097446	2.07601	40.0372	-4.2695	2.2113e-10	1.5398e-08	si:ch211-66i15.5	D-galactoside/L-rhamnose binding SUEL lectin domain
